# Supplementary material for: Estimating One-Year Risk of Incident Chronic Kidney Disease: Retrospective Development and Validation Study Using Electronic Medical Record Data From the State of Maine
Source: PubMed Central journal article supplement (PMC5550735; doi:10.2196/medinform.7954), 2017-07-26

Multimedia appendix 3. Construction of derivation and validation cohorts

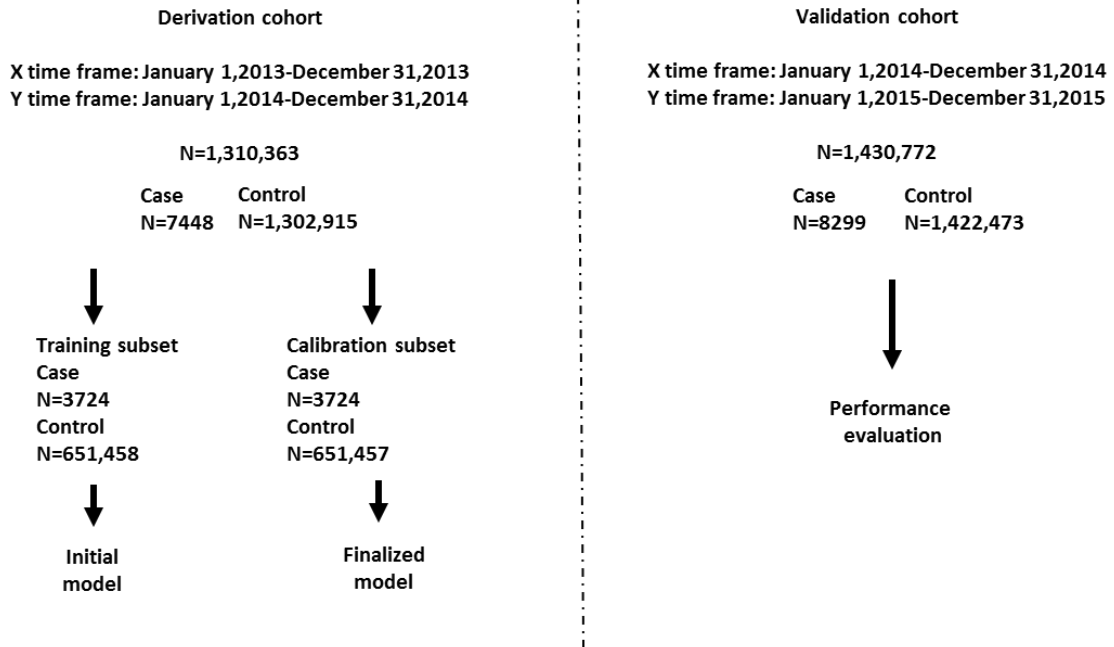

Supplement: medinform_v5i3e21_app3.pdf [file medinform_v5i3e21_app3.pdf]
