# Supplementary material for: Estimating One-Year Risk of Incident Chronic Kidney Disease: Retrospective Development and Validation Study Using Electronic Medical Record Data From the State of Maine
Source: PubMed Central journal article supplement (PMC5550735; doi:10.2196/medinform.7954), 2017-07-26
Supplement: medinform_v5i3e21_app7.pdf [file medinform_v5i3e21_app7.pdf]

Multimedia appendix 7. A two-by-two contingency table for the derivation cohort and the validation cohort. The cutoff score is 0.05.

|                      | Derivation |         | Validation |         |
|----------------------|------------|---------|------------|---------|
|                      | CKD (-)    | CKD (+) | CKD (-)    | CKD (+) |
| Predicted as CKD (-) | 1,268,143  | 2785    | 1,374,056  | 4122    |
| Predicted as CKD (+) | 34,772     | 4663    | 48,417     | 4177    |
