# Supplementary material for: Estimating One-Year Risk of Incident Chronic Kidney Disease: Retrospective Development and Validation Study Using Electronic Medical Record Data From the State of Maine
Source: PubMed Central journal article supplement (PMC5550735; doi:10.2196/medinform.7954), 2017-07-26
Supplement: medinform_v5i3e21_app9.pdf [file medinform_v5i3e21_app9.pdf]

Multimedia appendix 9. Comparison of c-statistics using other clinical prediction scores

| <b>Model</b>                          | <b>Cohort</b>                                                                                                                               | <b>Predictors</b>                                                                                                        | <b>c-statistic</b> |
|---------------------------------------|---------------------------------------------------------------------------------------------------------------------------------------------|--------------------------------------------------------------------------------------------------------------------------|--------------------|
| Hemmelgarn et al, 2007 <sup>1</sup>   | Patients aged 66+ and have serum creatinine measurements (n=6789 in derivation and n=3395 in validation)                                    | Age, heart diseases, diabetes, gout, anti-emetic medications                                                             | 0.59               |
| Thakkinstian et al, 2011 <sup>2</sup> | Patients aged 18+ (n=3459 for derivation)                                                                                                   | Age, diabetes, hypertension, and history of kidney stones                                                                | 0.741              |
| O'Seaghdha et al, 2012 <sup>3</sup>   | Patients from Framingham Heart Study (n=2490) for derivation and ARIC study (n=1777) for validation, and have serum creatinine measurements | Age, diabetes, hypertension, eGFR, albuminuria                                                                           | 0.813              |
| Our model                             | Patients from Maine HIE databases (n=1,310,363 for derivation and n=1,430,772 for validation)                                               | 146 clinical variables including demographics, diagnosis, medications, laboratory test results, and resource utilization | 0.871              |

1. Hemmelgarn, BR, Culleton, BF, Ghali, WA: Derivation and validation of a clinical index for prediction of rapid progression of kidney dysfunction. *QJM : monthly journal of the Association of Physicians*, 100: 87-92, 2007.
2. Thakkinstian, A, Ingsathit, A, Chaiprasert, A, Rattanasiri, S, Sangthawan, P, Gojaseni, P, Kiattisunthorn, K, Ongaiyooth, L, Thirakhupt, P: A simplified clinical prediction score of chronic kidney disease: a cross-sectional-survey study. *BMC Nephrol*, 12: 45, 2011.
3. O'Seaghdha, CM, Lyass, A, Massaro, JM, Meigs, JB, Coresh, J, D'Agostino, RB, Sr., Astor, BC, Fox, CS: A risk score for chronic kidney disease in the general population. *Am J Med*, 125: 270-277, 2012.
